# Supplementary material for: Investigating the role of endogenous estrogens, hormone replacement therapy, and blockade of estrogen receptor-α activity on breast metabolic signaling
Source: PubMed Central journal article supplement (PMC8557185; doi:10.1007/s10549-021-06354-w), 2021-08-26

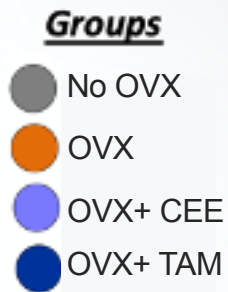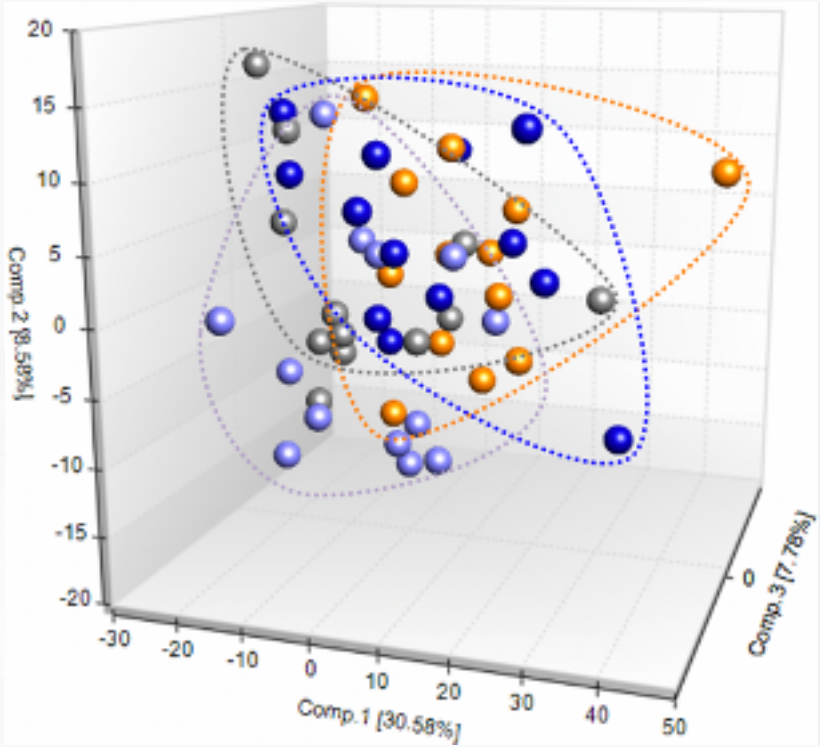

Supplement: 10549_2021_6354_MOESM4_ESM.pdf [file 10549_2021_6354_MOESM4_ESM.pdf]
